# Supplementary material for: Fluorescence sensing of nitro-aromatics by Zn(ii) and Cd(ii) based coordination polymers having the 5-[bis(4-carboxybenzyl)-amino]isophthalic acid ligand
Source: Royal Society of Chemistry journal article supplement (doi:10.1039/c7nj00183e), 2017-01-01
Supplement: c7nj00183e1.pdf [file c7nj00183e1.pdf]

## Supporting Information

### Fluorescent sensing of nitro-aromatics by Zn(II) and Cd(II) based coordination polymers having 5-[bis(4-carboxybenzyl)-amino]isophthalic acid ligand

Lu Lu,<sup>a\*</sup> Jun Wang,<sup>a</sup> Bin Xie,<sup>a</sup> Jian-Qiang Liu,<sup>b\*</sup> Reena Yadav,<sup>c</sup> Amita Singh,<sup>c</sup> and Abhinav Kumar<sup>c\*</sup>

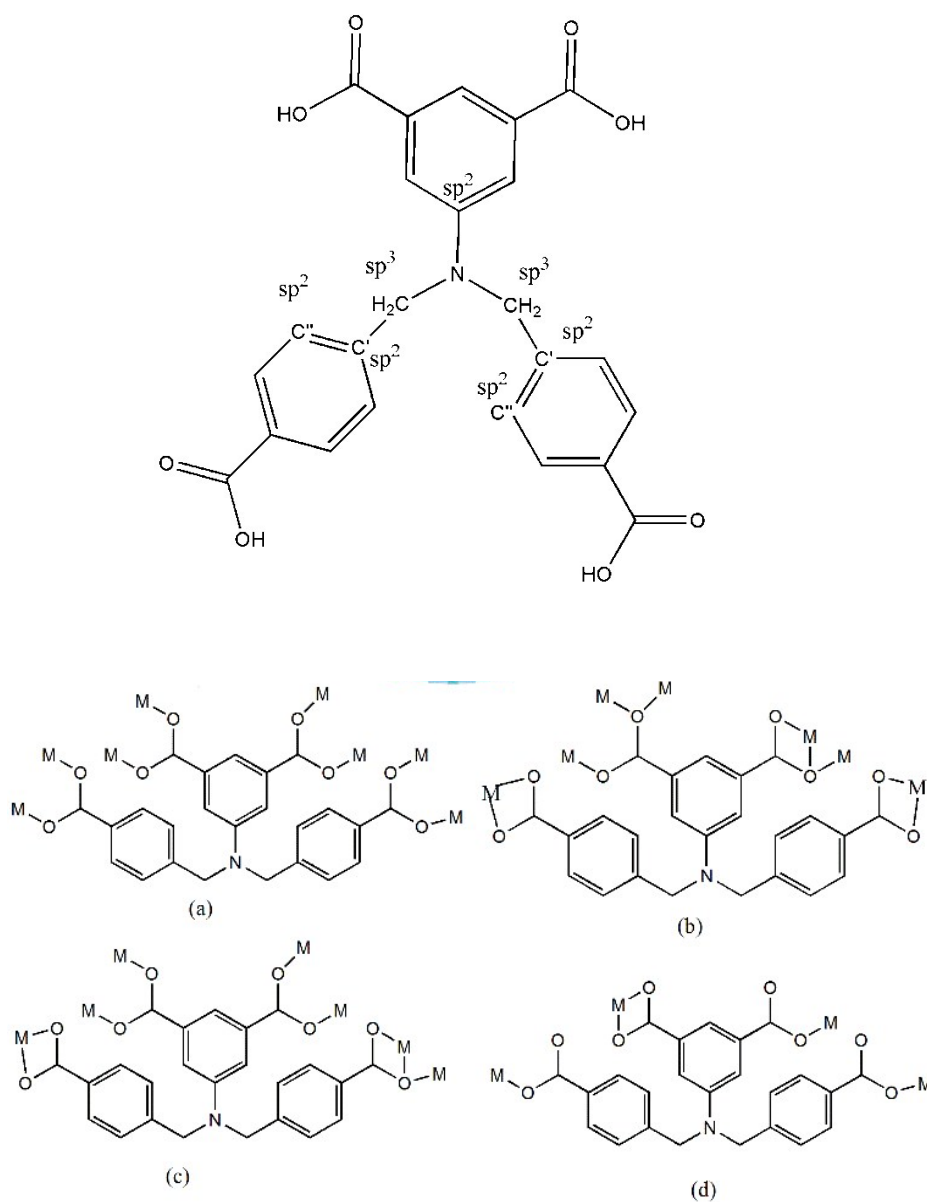

Scheme S1 The structural skeleton of 5-[bis(3-carboxybenzyl)-amino]isophthalic acid and its different coordination modes in this work.

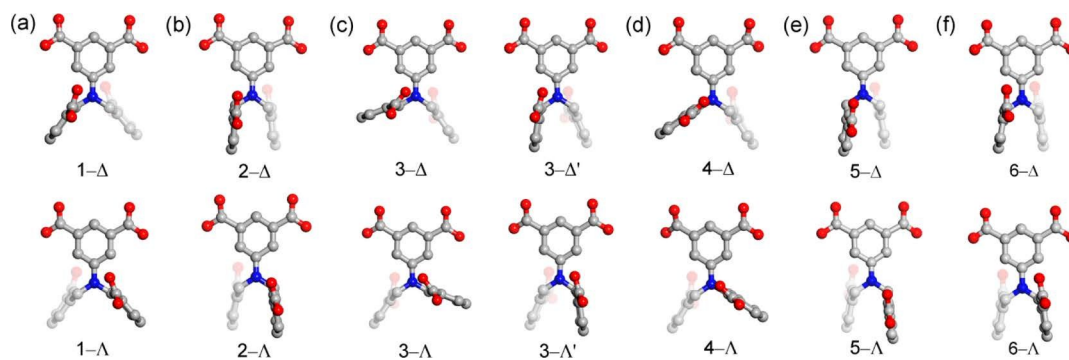

Scheme S2 (a–f) Different stereoisomers of ligands existed in compounds in this work and was reported and found by Xing

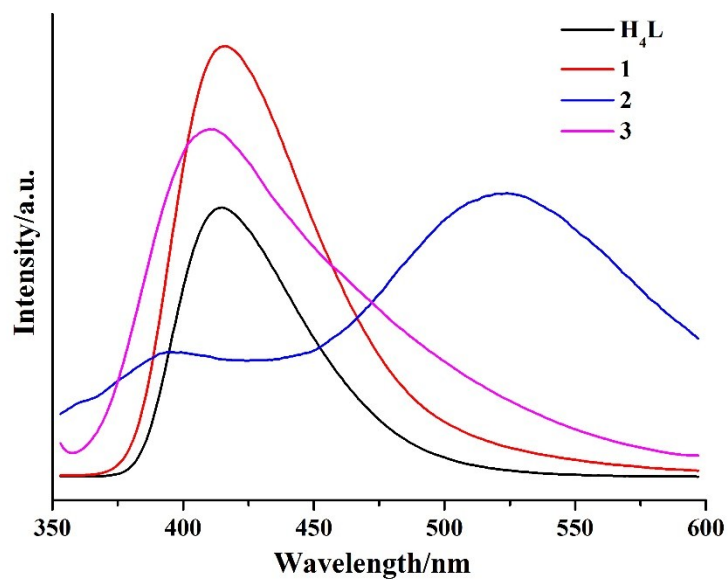

Fig. S1 view of PL at room temperature for  $H_4L$  ligand and 1-3.

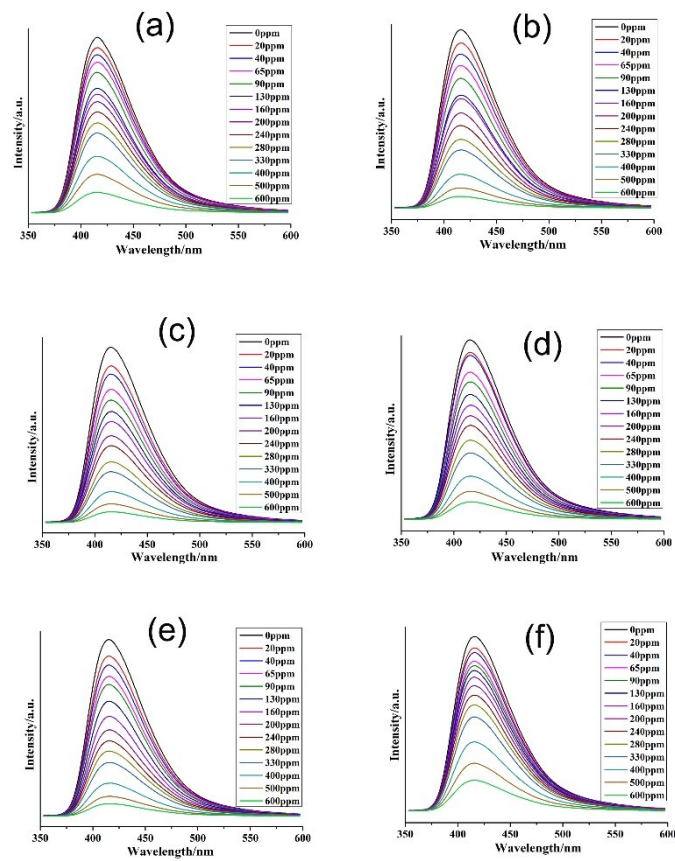

Fig. S2 Concentration-dependent luminescence quenching of **1** (dispersion in DMF) after adding different concentrations of (a) 1,3-DNB, (b) 2,4-DNT, (c) 2,6-DNT, (d) 2-NT, (e) 4-NT and (f) NB excited at 325 nm at room temperature.

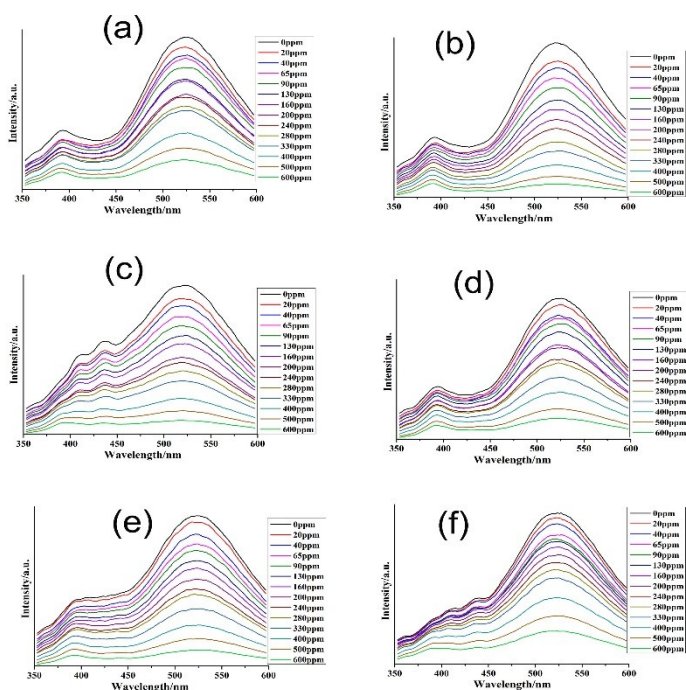

Fig. S3 Concentration-dependent luminescence quenching of **2** (dispersion in DMF) after adding different concentrations of (a) 1,3-DNB, (b) 2,4-DNT, (c) 2,6-DNT, (d) 2-NT, (e) 4-NT and (f) NB excited at 325 nm at room temperature.

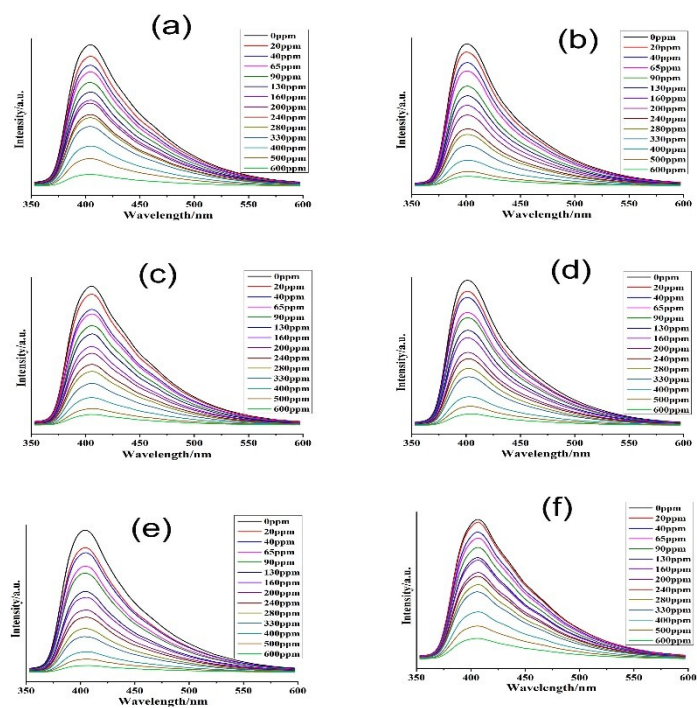

Fig. S4 Concentration-dependent luminescence quenching of **3** (dispersion in DMF) after adding different concentrations of (a) 1,3-DNB, (b) 2,4-DNT, (c) 2,6-DNT, (d) 2-NT, (e) 4-NT and (f) NB excited at 325 nm at room temperature.

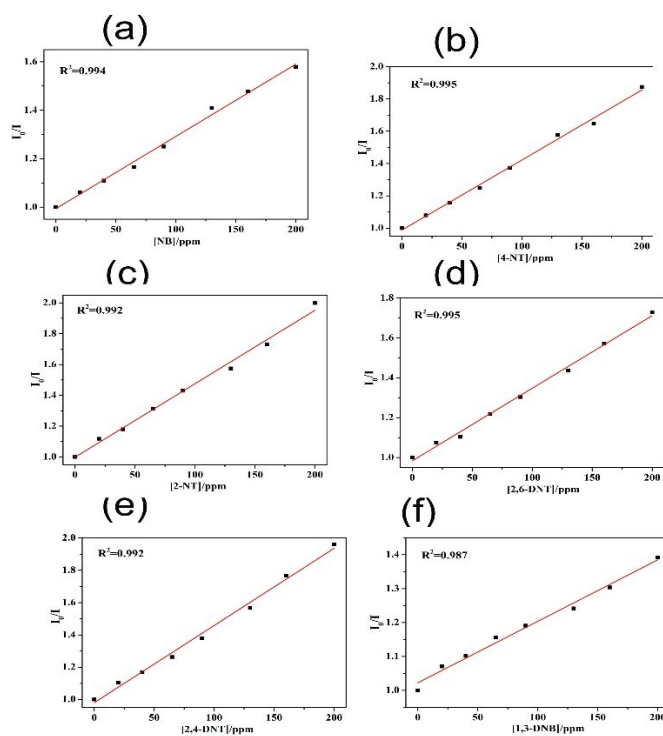

Fig. S5 plots of the  $I_0/I$  in **1**.

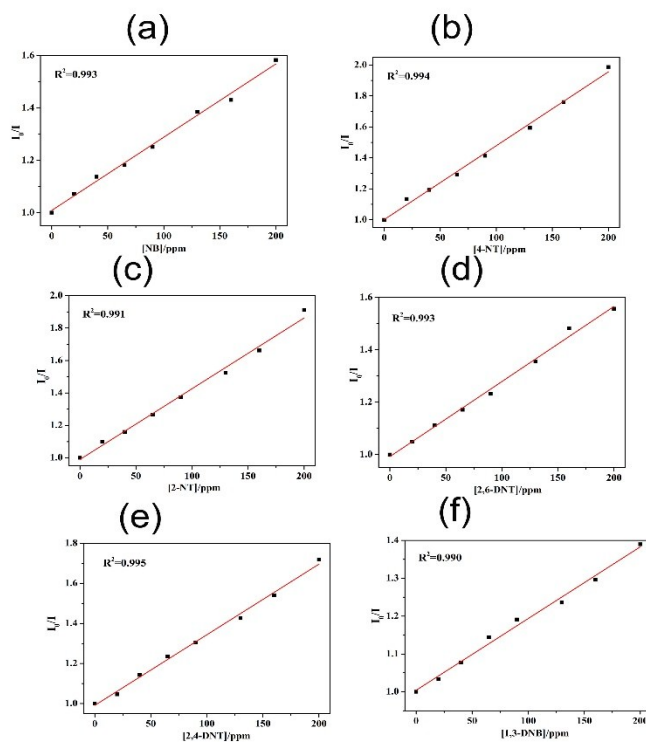

Fig. S6 plots of the  $I_0/I$  in **2**.

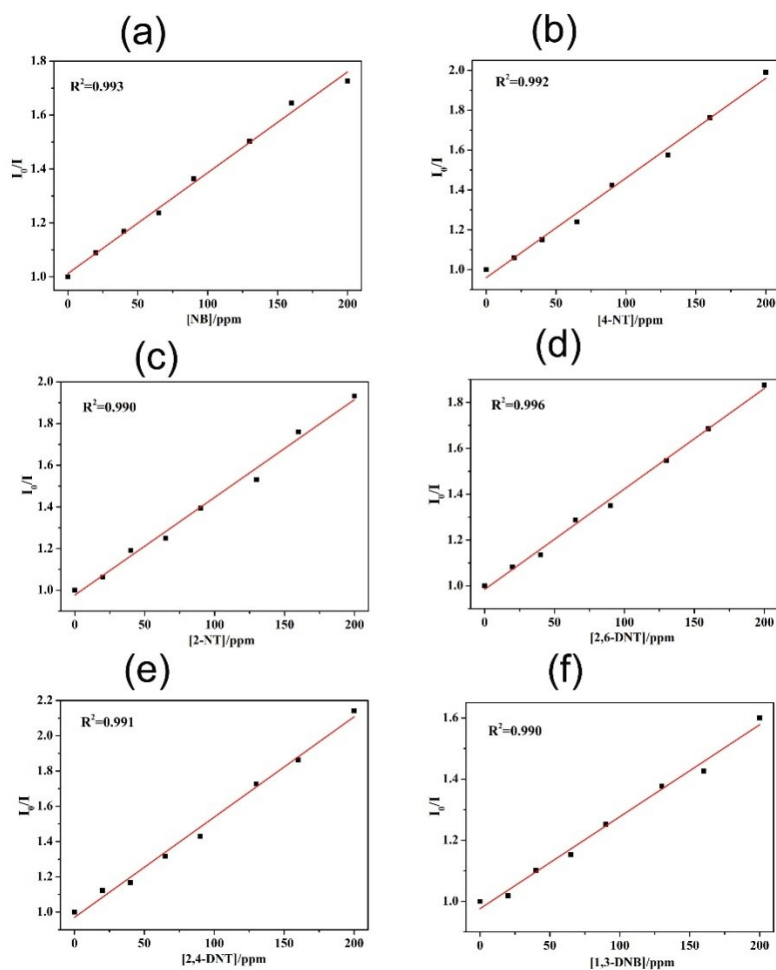

Fig. S7 plots of the  $I_0/I$  in **3**.

The asymmetric stretching vibration  $\nu(\text{COO}^-)$  appear around  $1610\text{ cm}^{-1}$  for **1-3**, and the symmetric stretching vibration  $\nu(\text{COO}^-)$  are observed  $1425\text{ cm}^{-1}$  for **1-3**. For these complexes, the difference between the asymmetric and symmetric stretches,  $\Delta\nu_{\text{as}(\text{COO}^-)-\nu_{\text{s}(\text{COO}^-)}$ , are on the order of  $150\text{ cm}^{-1}$  indicating that carboxyl groups are coordinated to the metal in a bidentate modes, consistent with the observed X-ray crystal structures of **1-3**. As shown in Fig. S8

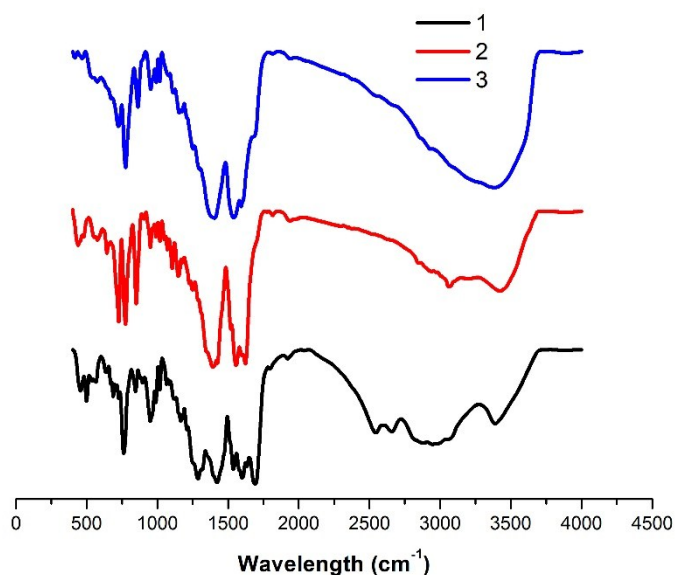

Fig. S8 view of the IR spectra in **1-3**.

Thermal gravimetric analyses (TGA) were carried out to examine the thermal stabilities of **1-3**. The results show that the weight of complexes **1-3** are very stable in air at ambient temperature, which make them potential candidates for practical applications. The samples were heated up in flowing N<sub>2</sub>. For complex **1**, the decomposition of the compound occurs at ca. 330 °C. The remaining weight corresponds to the formation of ZnO. For **2**, the weight loss corresponding to the release of the coordinated and lattice water molecules is observed from 90 to 115 °C. The anhydrous complex begins to decompose at 360 °C. The TGA curve of **3** indicates that there is two loss steps. The first weight loss corresponds to the release of the one coordinated and one lattice water molecules is observed from 90 to 165 °C. Then a sharp weight-loss step was observed between 320 and 510°C, which can be attributed to the decomposition of organic ligands.

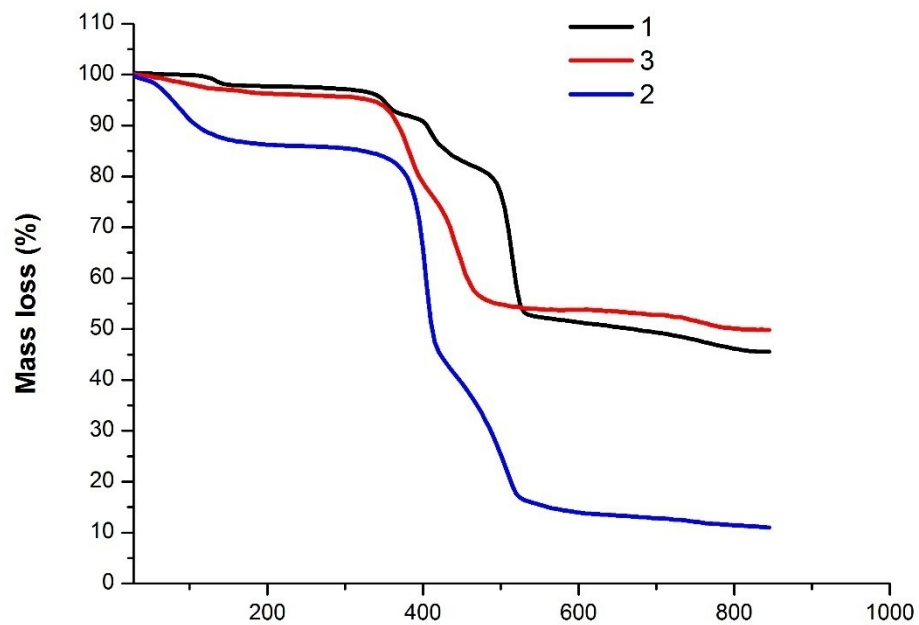

Fig. S9 View of the TGA in 1-3.

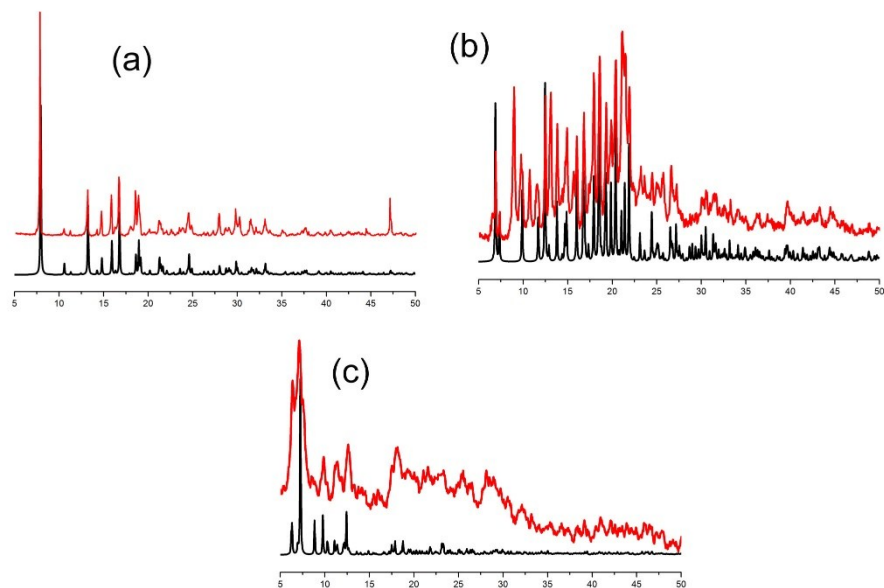

Fig. S10 The experimental X-ray powder diffraction diagrams of compounds 1-3 compared to the calculated ones.



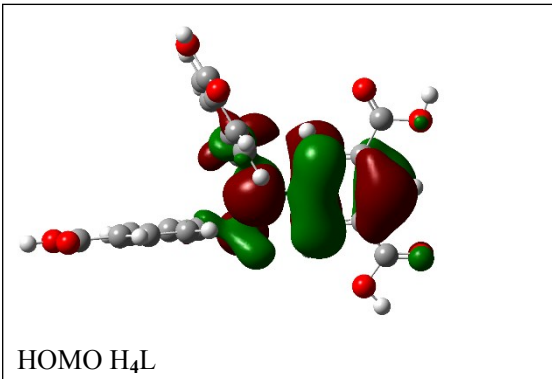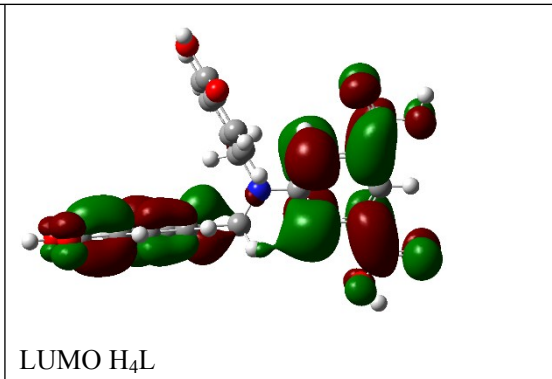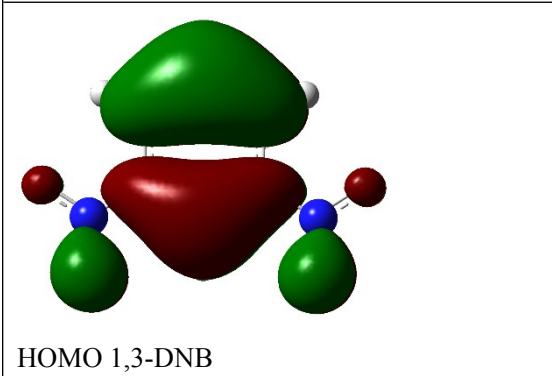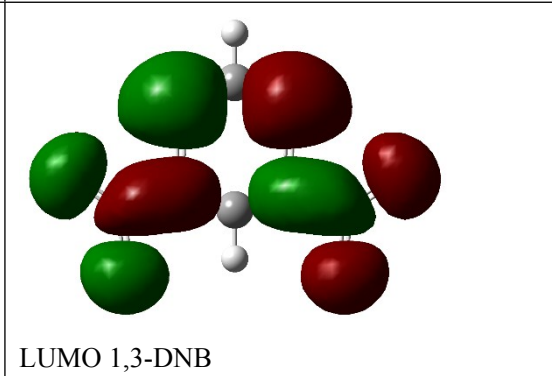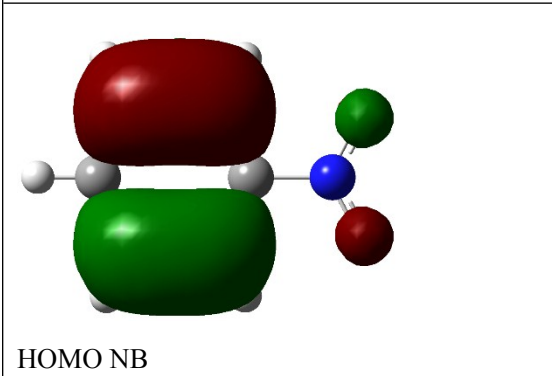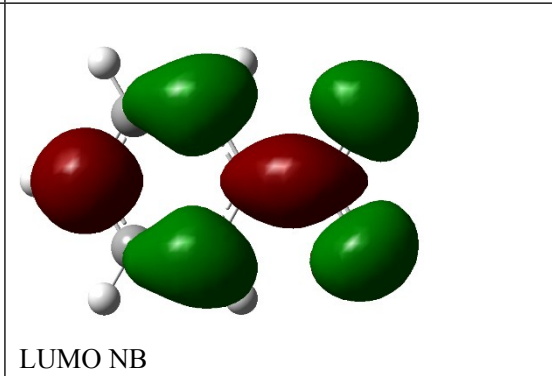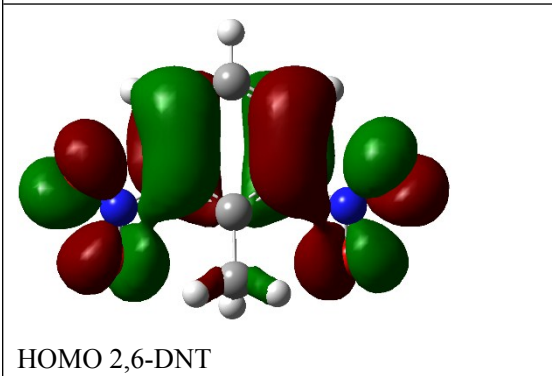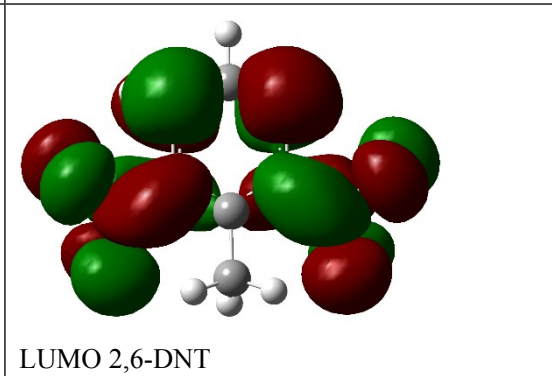

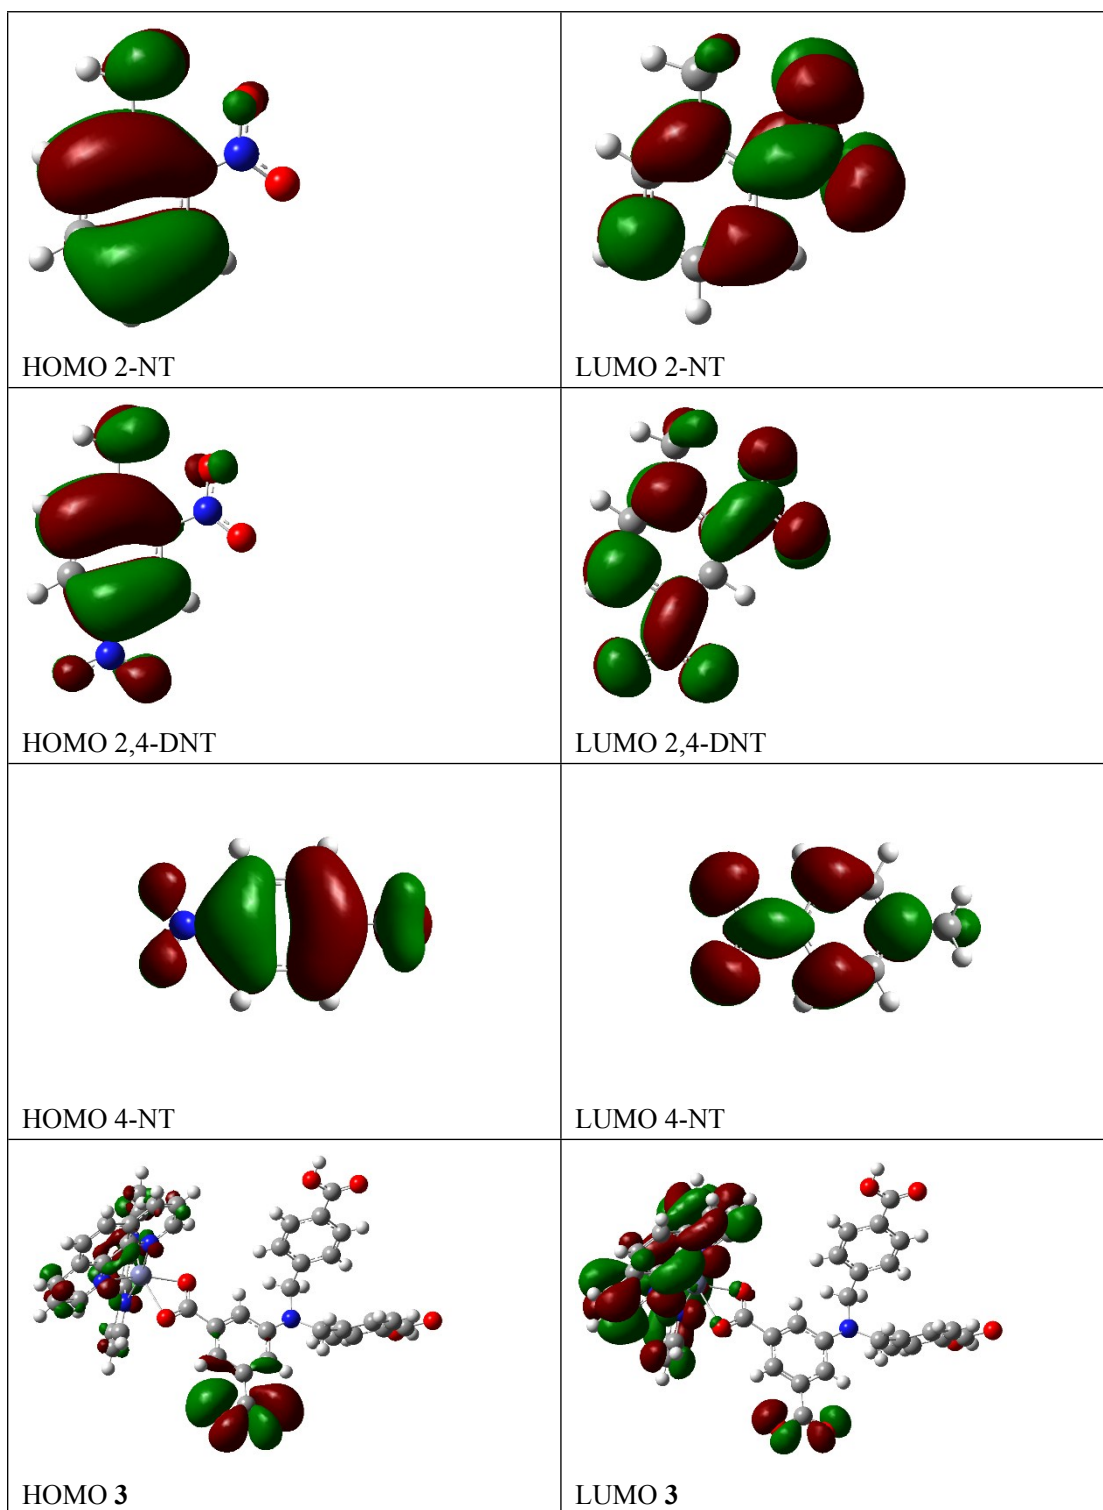

Fig. S11 HOMO-LUMO plots of nitro-aromatics

Table S1. Crystal data and structure refinement information for **1-3**

| Parameter                                                            | 1              | 2              | 3              |
|----------------------------------------------------------------------|----------------|----------------|----------------|
| Formula weight                                                       | 576.11         | 1435.93        | 972.55         |
| Crystal system                                                       | Monoclinic     | Triclinic      | Monoclinic     |
| Space group                                                          | <i>P21/n</i>   | <i>P-1</i>     | <i>C/c</i>     |
| Crystal color                                                        | Colorless      | Colorless      | Colorless      |
| <i>a</i> , Å                                                         | 9.6605(6)      | 14.9150(9)     | 25.448(15)     |
| <i>b</i> , Å                                                         | 22.2522(14)    | 15.7739(9)     | 15.151(8)      |
| <i>c</i> , Å                                                         | 11.3772(7)     | 16.0320(9)     | 11.157(7)      |
| $\alpha$ , °                                                         | 90             | 100.6592(7)    | 90             |
| $\beta$ , °                                                          | 106.976(2)     | 112.2087(6)    | 108.613(10)    |
| $\gamma$ , °                                                         | 90             | 107.2279(7)    | 90             |
| <i>V</i> , Å <sup>3</sup>                                            | 2339.2(3)      | 3141.7(3)      | 4077(4)        |
| <i>Z</i>                                                             | 4              | 2              | 4              |
| $\rho_{\text{calcd}}$ , g/cm <sup>3</sup>                            | 1.636          | 1.518          | 1.584          |
| $\mu$ , mm <sup>-1</sup>                                             | 2.101          | 1.097          | 1.248          |
| <i>F</i> (000)                                                       | 1160           | 1416           | 1992           |
| $\theta$ Range, deg                                                  | 3.0-25.0       | 1.4-27.5       | 1.6-25.0       |
| Reflection collected                                                 | 4116           | 25158          | 6744           |
| Independent reflections ( <i>R</i> <sub>int</sub> )                  | 0.064          | 0.020          | 0.0469         |
| Reflections with $I > 2\sigma(I)$                                    | 3564           | 13366          | 5336           |
| Number of parameters                                                 | 316            | 688            | 586            |
| <i>R</i> <sub>1</sub> , <i>wR</i> <sub>2</sub> ( $I > 2\sigma(I)$ )* | 0.0300, 0.0791 | 0.0587, 0.1633 | 0.0455, 0.0960 |
| <i>R</i> <sub>1</sub> , <i>wR</i> <sub>2</sub> (all data)**          | 0.0374, 0.0823 | 0.0721, 0.1778 | 0.0668, 0.1235 |

\*  $R = \sum(F_o - F_c) / \sum(F_o)$ , \*\*  $wR_2 = \{\sum[w(F_o^2 - F_c^2)^2] / \sum(F_o^2)\}^{1/2}$ .

**Table S2.** Selected bond distances (Å) and angles (deg) for **1-3**

| Bond | <i>d</i> , Å | Bond | <i>d</i> , Å |
|------|--------------|------|--------------|
|------|--------------|------|--------------|

|                          |            |                          |            |
|--------------------------|------------|--------------------------|------------|
|                          |            | 1                        |            |
| Zn(1)-O(5)               | 1.944(2)   | Zn(1)-O(4) <sup>b</sup>  | 1.919(2)   |
| Zn(1)-O(6) <sup>e</sup>  | 1.9412(19) | Zn(1)-O(2) <sup>h</sup>  | 1.9404(19) |
| Zn(2)-O(8)               | 1.9339(19) | Zn(2)-O(3) <sup>a</sup>  | 1.923(2)   |
| Zn(2)-O(7) <sup>f</sup>  | 1.9247(19) | Zn(2)-O(1) <sup>g</sup>  | 1.924(2)   |
|                          |            | 2                        |            |
| Cd(1)-O(1)               | 2.553(5)   | Cd(1)-O(9)               | 2.305(5)   |
| Cd(1)-O(5) <sup>a</sup>  | 2.477(7)   | Cd(1)-O(6) <sup>a</sup>  | 2.341(7)   |
| Cd(1)-O(15) <sup>e</sup> | 2.380(5)   | Cd(1)-O(16) <sup>e</sup> | 2.476(5)   |
| Cd(1)-O(3) <sup>g</sup>  | 2.277(5)   | Cd(1)-O(4) <sup>g</sup>  | 2.675(4)   |
| Cd(2)-O(1)               | 2.408(5)   | Cd(2)-O(1W)              | 2.496(8)   |
| Cd(2)-O(9)               | 2.345(5)   | Cd(2)-O(13) <sup>d</sup> | 2.340(16)  |
| Cd(2)-O(16) <sup>e</sup> | 2.362(4)   | Cd(2)-O(11) <sup>f</sup> | 2.253(5)   |
| Cd(3)-O(2)               | 2.213(5)   | Cd(3)-O(10)              | 2.230(5)   |
| Cd(3)-O(7) <sup>c</sup>  | 2.40 (2)   | Cd(3)-O(8) <sup>c</sup>  | 2.298(17)  |
| Cd(3)-O(12) <sup>f</sup> | 2.314(5)   | Cd(3)-O(4) <sup>g</sup>  | 2.309(5)   |
|                          |            | 3                        |            |
| Zn(1)-O(2)               | 2.318(8)   | Zn(1)-N(1)               | 2.141(8)   |
| Zn(1)-N(2)               | 2.136(10)  | Zn(1)-N(3)               | 2.127(8)   |
| Zn(1)-N(4)               | 2.146(8)   | Zn(1)-O(1)               | 2.112(7)   |
| Zn(2)-O(3)               | 1.950(8)   | Zn(2)-O(7) <sup>b</sup>  | 1.955(7)   |
| Zn(2)-O(6) <sup>c</sup>  | 1.928(8)   | Zn(2)-O(1W)              | 1.976(8)   |

| Angle                                      | $\omega$ , deg | Angle                                       | $\omega$ , deg |
|--------------------------------------------|----------------|---------------------------------------------|----------------|
|                                            |                | 1                                           |                |
| O(4) <sup>b</sup> -Zn(1)-O(5)              | 117.68(9)      | O(5)-Zn(1)-O(6) <sup>e</sup>                | 110.04(8)      |
| O(2) <sup>h</sup> -Zn(1)-O(5)              | 98.88(8)       | O(4) <sup>b</sup> -Zn(1)-O(6) <sup>e</sup>  | 100.79(8)      |
| O(2) <sup>h</sup> -Zn(1)-O(4) <sup>b</sup> | 124.94(8)      | O(2) <sup>h</sup> -Zn(1)-O(6) <sup>e</sup>  | 103.49(8)      |
| O(3) <sup>a</sup> -Zn(2)-O(8)              | 106.00(8)      | O(7) <sup>f</sup> -Zn(2)-O(8)               | 123.91(8)      |
| O(1) <sup>g</sup> -Zn(2)-O(8)              | 100.25(9)      | O(3) <sup>a</sup> -Zn(2)-O(7) <sup>f</sup>  | 99.25(8)       |
| O(1) <sup>g</sup> -Zn(2)-O(3) <sup>a</sup> | 124.63(9)      | O(1) <sup>g</sup> -Zn(2)-O(7) <sup>f</sup>  | 105.02(8)      |
|                                            |                | 2                                           |                |
| O(1)-Cd(1)-O(9)                            | 74.71(16)      | O(1)-Cd(1)-O(5) <sup>a</sup>                | 140.59(19)     |
| O(1)-Cd(1)-O(6) <sup>a</sup>               | 159.48(19)     | O(1)-Cd(1)-O(15) <sup>e</sup>               | 80.67(17)      |
| O(1)-Cd(1)-O(16) <sup>e</sup>              | 69.18(15)      | O(1)-Cd(1)-O(3) <sup>g</sup>                | 82.45(16)      |
| O(5) <sup>a</sup> -Cd(1)-O(9)              | 79.4(2)        | O(6) <sup>a</sup> -Cd(1)-O(9)               | 99.9(2)        |
| O(9)-Cd(1)-O(15) <sup>e</sup>              | 124.70(16)     | O(3) <sup>g</sup> -Cd(1)-O(9)               | 131.28(15)     |
| O(4) <sup>g</sup> -Cd(1)-O(9)              | 80.17(15)      | O(5) <sup>a</sup> -Cd(1)-O(16) <sup>e</sup> | 128.54(19)     |
| O(1)-Cd(2)-O(1W)                           | 143.6(2)       | O(1)-Cd(2)-O(9)                             | 76.83(17)      |
| O(1W)-Cd(2)-O(9)                           | 84.8(2)        | O(1W)-Cd(2)-O(13) <sup>d</sup>              | 121.7(4)       |
| O(1W)-Cd(2)-O(16) <sup>e</sup>             | 71.0(2)        | O(9)-Cd(2)-O(11) <sup>f</sup>               | 83.06(19)      |
| O(9)-Cd(2)-O(13) <sup>d</sup>              | 148.0(3)       | O(9)-Cd(2)-O(16) <sup>e</sup>               | 72.63(16)      |
| O(2)-Cd(3)-O(10)                           | 146.09(16)     | O(2)-Cd(3)-O(7) <sup>c</sup>                | 79.9(6)        |
| O(2)-Cd(3)-O(8) <sup>c</sup>               | 126.9(4)       | O(2)-Cd(3)-O(12) <sup>f</sup>               | 85.6(2)        |

|                                             |          |                                            |           |
|---------------------------------------------|----------|--------------------------------------------|-----------|
| O(7) <sup>c</sup> -Cd(3)-O(10)              | 132.5(6) | O(8) <sup>c</sup> -Cd(3)-O(10)             | 86.5(4)   |
| O(10)-Cd(3)-O(12) <sup>f</sup>              | 84.5(2)  | O(4) <sup>g</sup> -Cd(3)-O(10)             | 82.93(17) |
| O(7) <sup>c</sup> -Cd(3)-O(12) <sup>f</sup> | 90.6(5)  | O(4) <sup>g</sup> -Cd(3)-O(7) <sup>c</sup> | 125.1(5)  |
| 3                                           |          |                                            |           |
| O(1)-Zn(1)-O(2)                             | 59.5(2)  | O(1)-Zn(1)-N(1)                            | 151.9(3)  |
| O(1)-Zn(1)-N(2)                             | 95.0(3)  | O(1)-Zn(1)-N(3)                            | 94.1(3)   |
| O(1)-Zn(1)-N(4)                             | 92.6(3)  | O(2)-Zn(1)-N(1)                            | 94.8(3)   |
| O(2)-Zn(1)-N(2)                             | 101.8(3) | O(2)-Zn(1)-N(3)                            | 149.3(3)  |
| O(2)-Zn(1)-N(4)                             | 87.0(3)  | N(1)-Zn(1)-N(2)                            | 78.3(3)   |
| N(1)-Zn(1)-N(3)                             | 113.6(3) | N(1)-Zn(1)-N(4)                            | 97.5(3)   |
| N(2)-Zn(1)-N(3)                             | 95.5(3)  | N(2)-Zn(1)-N(4)                            | 170.5(2)  |
| O(1W)-Zn(2)-O(3)                            | 112.7(4) | O(1W)-Zn(2)-O(7) <sup>b</sup>              | 95.4(3)   |
| O(1W)-Zn(2)-O(6) <sup>c</sup>               | 116.4(4) | O(3)-Zn(2)-O(7) <sup>b</sup>               | 105.6(3)  |
| O(3)-Zn(2)-O(6) <sup>c</sup>                | 107.4(3) | O(6) <sup>c</sup> -Zn(2)-O(7) <sup>b</sup> | 118.7(3)  |

1: a =  $-3/2-x, -1/2+y, 1/2-z$ ; b =  $-3/2-x, -1/2+y, 3/2-z$ ; e =  $-2-x, -y, 1-z$ ; f =  $-1-x, -y, -z$ ; g =  $-1/2+x, 1/2-y, -1/2+z$ ; h =  $-1/2+x, 1/2-y, 1/2+z$

2: a =  $-1+x, y, z$ ; c =  $x, y, 1+z$ ; d =  $1+x, y, z$ ; e =  $1-x, 1-y, 1-z$ ; f =  $1-x, 1-y, 2-z$ ; g =  $2-x, 2-y, 2-z$

3: b =  $x, 1+y, z$ ; c =  $-1/2+x, 3/2-y, -1/2+z$

Table S3. The HOMO-LUMO energies for different analytes other than nitroaromatics.

| Analyte         | HOMO  | LUMO  |
|-----------------|-------|-------|
| Nitrobenzene    | -7.60 | -2.44 |
| Chloroform      | -8.60 | -1.36 |
| Dichloromethane | -8.42 | -0.44 |
| Acetone         | -6.64 | -0.3  |
| DMF             | -6.32 | 0.99  |
| Acetonitrile    | -8.87 | 1.00  |
| DMSO            | -6.05 | 1.16  |
| Water           | -7.94 | 1.78  |
| iso-propanol    | -7.10 | 2.00  |
| Methanol        | -7.21 | 2.10  |
| THF             | -4.20 | 2.17  |
| DMA             | -5.85 | 2.37  |
| Dioxane         | -6.41 | 2.59  |
